# Supplementary material for: Ribosome assembly factor Adenylate Kinase 6 maintains cell proliferation and cell size homeostasis during root growth
Source: PubMed Central journal article supplement (PMC7028144; doi:10.1111/nph.16291), 2019-12-02
Supplement: NPH-225-2064-s001.pdf [file NPH-225-2064-s001.pdf]

**Article title: Ribosome assembly factor Adenylate Kinase 6 maintains cell proliferation and cell size homeostasis during root growth**

Authors: Radka Slovak, Claudia Setzer, Mykola Roiuk, Jonas Bertels, Christian Göschl, Katharina Jandrasits, Gerrit T. S. Beemster, and Wolfgang Busch

Article acceptance date: 19 October 2019.

The following Supplementary Data is available for this article:

**Fig. S1** Natural phenotypic variation and GWAS of root growth rate 7th day after stratification

**Fig. S2** Relative *AAK6* expression levels and root growth in wild type, SALK\_015289 (*aak6* *-/-*) and *AAK6* overexpression line (*35S:AAK6*)

**Fig. S3** Complementation of *aak6* *-/-* by *pAAK6:AAK6-Clover*, in the shoots

**Fig. S4** Complementation of *aak6* *-/-* by *pAAK6:AAK6*, in the root

**Fig. S5** Root anatomy parameters of *aak6* *-/-* compared to wild type

**Fig. S6** Kinematic analysis of root growth

**Fig. S7** Replicates of ribosome/polysome profiles

**Table S1** 252 *Arabidopsis thaliana* accessions used in this study

**Table S2** Phenotypes of T-DNA insertion mutant lines (t-test p-values)

**Table S3** Primers used in this study

**Table S4** Impact of seed size on root growth traits

**Table S5** Genome-wide significant GWAS associations (FDR 5%) aggregated for 16 root growth traits and time-course experiment, 3rd - 7th day after stratification (DAS). *Spreadsheet 1*: Data from 252 accessions. *Spreadsheet 2*: Data from 160 accessions

**Table S6** Alignment of *AAK6* coding sequences (amino acids) of Bå4-1, Col-0, and Tha-1

**Table S7** Proportions of nuclear ploidy classes in the root apices

**Methods S1** Relative expression fold change of the *AAK6* gene

**Methods S2** Seed size measurements

**Notes S1** Precautions taken in propagation of natural accessions

**Notes S2** Precautions taken with SALK T-DNA lines

**Notes S3** Increase in endopolyploidy levels accompanies increase in mature cell size in *aak6* mutant

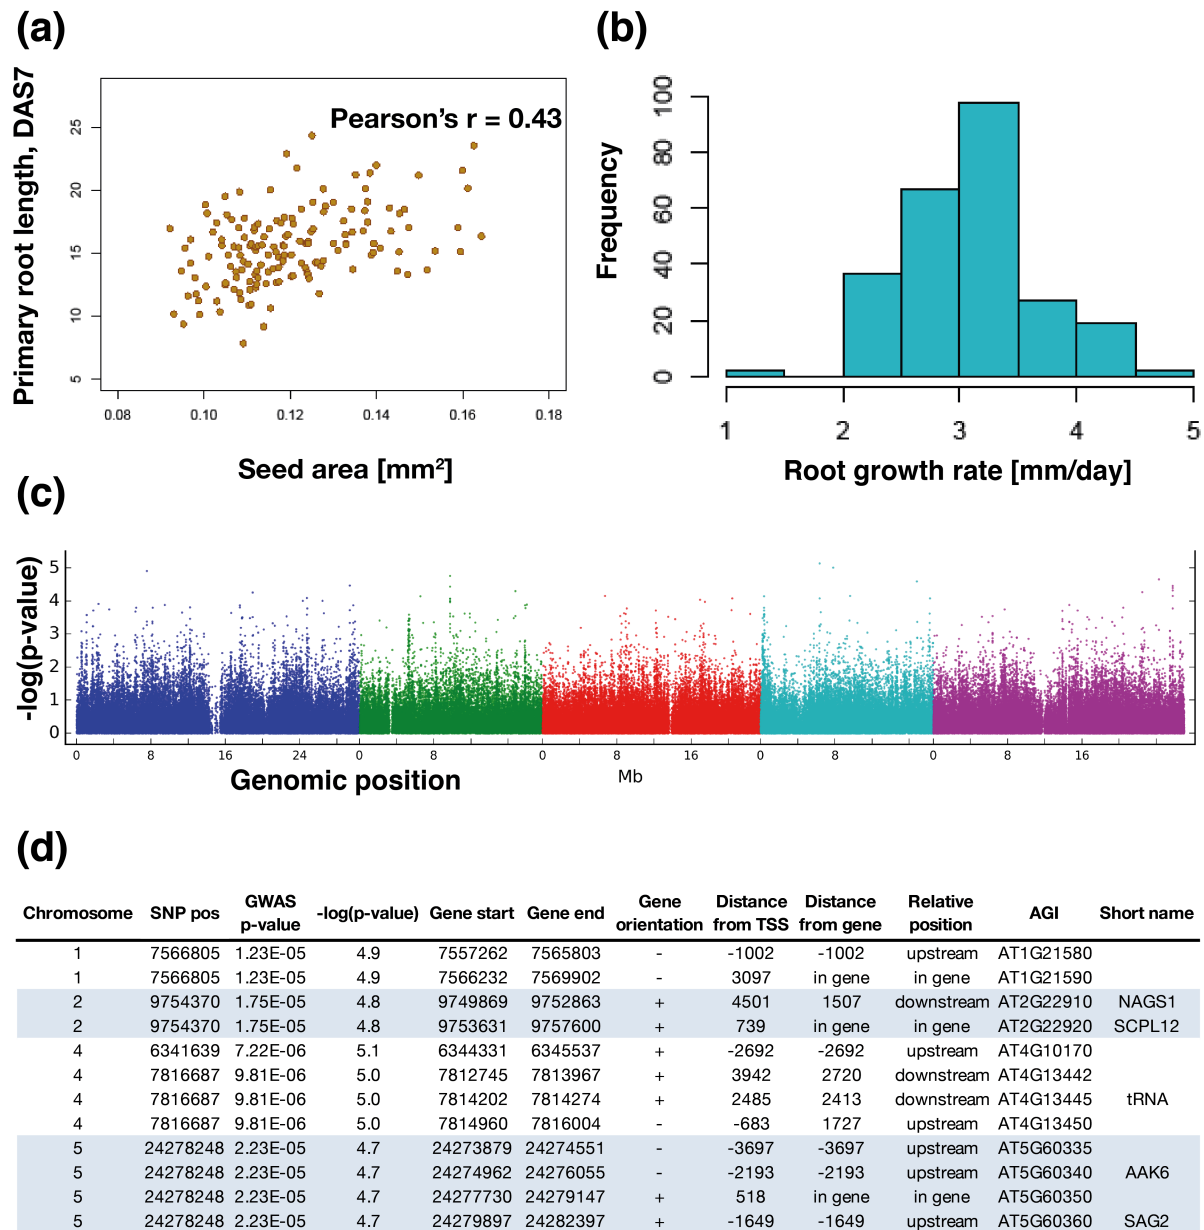

**Fig. S1** Natural phenotypic variation and GWAS of root growth rate 7th day after stratification. (a) Correlation of average root length on 7th day after stratification (DAS) (seedlings from seeds of natural seed sizes (Slovak et al., 2014)) with average seed size (this study, Methods S2) for 160 natural accessions. Each dot represents one accession. (b) Histogram of natural phenotypic variation of root growth rate on DAS7 (seedlings from size-controlled seeds) (c) GWAS Manhattan plot showing association of SNPs and root growth rate on DAS7 data from 252 accessions; x-axis: genomic position, y-axis:  $-\log(p\text{-value})$  for each SNP. (d) TOP 5 associated genomic regions for GWAS of root growth rate on DAS7.

Slovak R, Göschl Christian, Su X, Shimotani K, Shiina T and Busch W. 2014. A Scalable Open-Source Pipeline for Large-Scale Root Phenotyping of Arabidopsis. *Plant Cell* 26: 2390–2403.

(a)

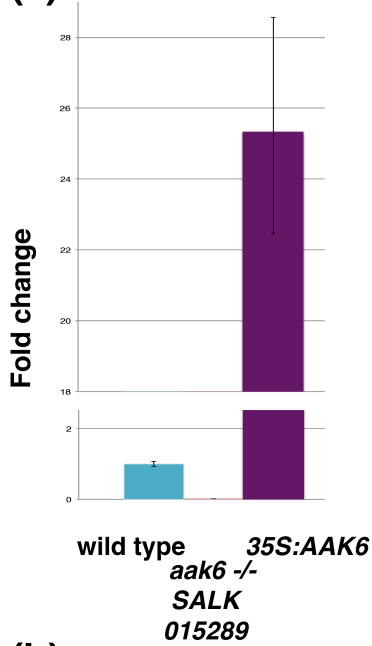

(b)

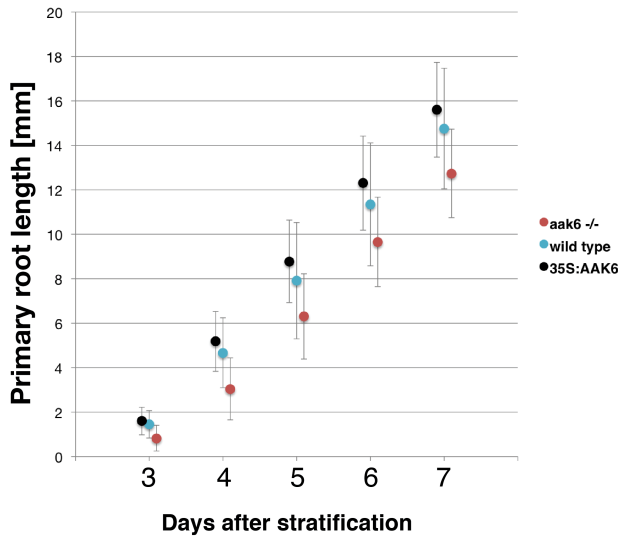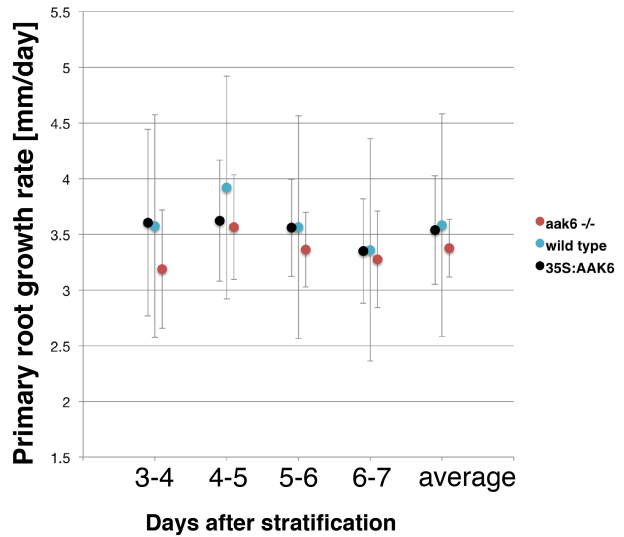

|                       | TL DAS3 | TL DAS4 | TL DAS5 | TL DAS6 | TL DAS7 | GR DAS 3-4 | GR DAS 4-5 | GR DAS 5-6 | GR DAS 6-7 | GR average |
|-----------------------|---------|---------|---------|---------|---------|------------|------------|------------|------------|------------|
| Col-0 vs. <i>aak6</i> | 0.006   | 0.000   | 0.008   | 0.011   | 0.001   | 0.132      | 0.022      | 0.045      | 0.439      | 0.027      |
| Col-0 vs. OX          | 0.386   | 0.180   | 0.146   | 0.132   | 0.173   | 0.896      | 0.069      | 0.967      | 0.929      | 0.695      |

in blue: values highlighted at an uncorrected significance threshold  $\alpha = 0.05$

in red: significant after correction for testing multiple genotypes, significance threshold  $\alpha = 0.025$

**Fig. S2** Relative *AAK6* expression levels and root growth in the wild type, SALK\_015289 (*aak6 -/-*) and *AAK6* overexpression line (35S:*AAK6*). (a) Relative *AAK6* expression levels in the wild type, SALK\_015289 (*aak6 -/-*) and *AAK6* overexpression line (35S:*AAK6*), whiskers represent standard deviation. See also Methods S1. (b) Root growth of *aak6*, wild type and 35S:*AAK6*, 3rd - 7th day after stratification (DAS). Whiskers represent standard deviation. t-test p-values are indicated in the table.

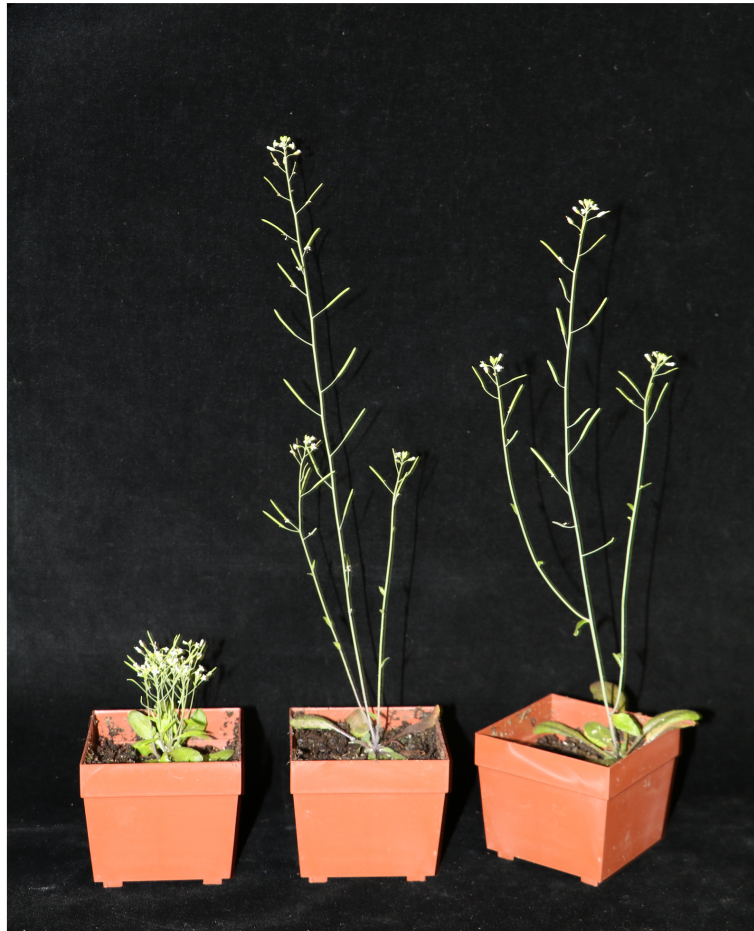

|                    |                          |                          |           |
|--------------------|--------------------------|--------------------------|-----------|
| <b>transgene:</b>  | <i>pAAK6:AAK6-Clover</i> | <i>pAAK6:AAK6-Clover</i> |           |
| <b>background:</b> | <i>aak6 -/-</i>          | <i>aak6 -/-</i>          | wild type |

**Fig. S3** Complementation of *aak6 -/-* by *pAAK6:AAK6-Clover*, in the shoots. 2 month old representative plants.

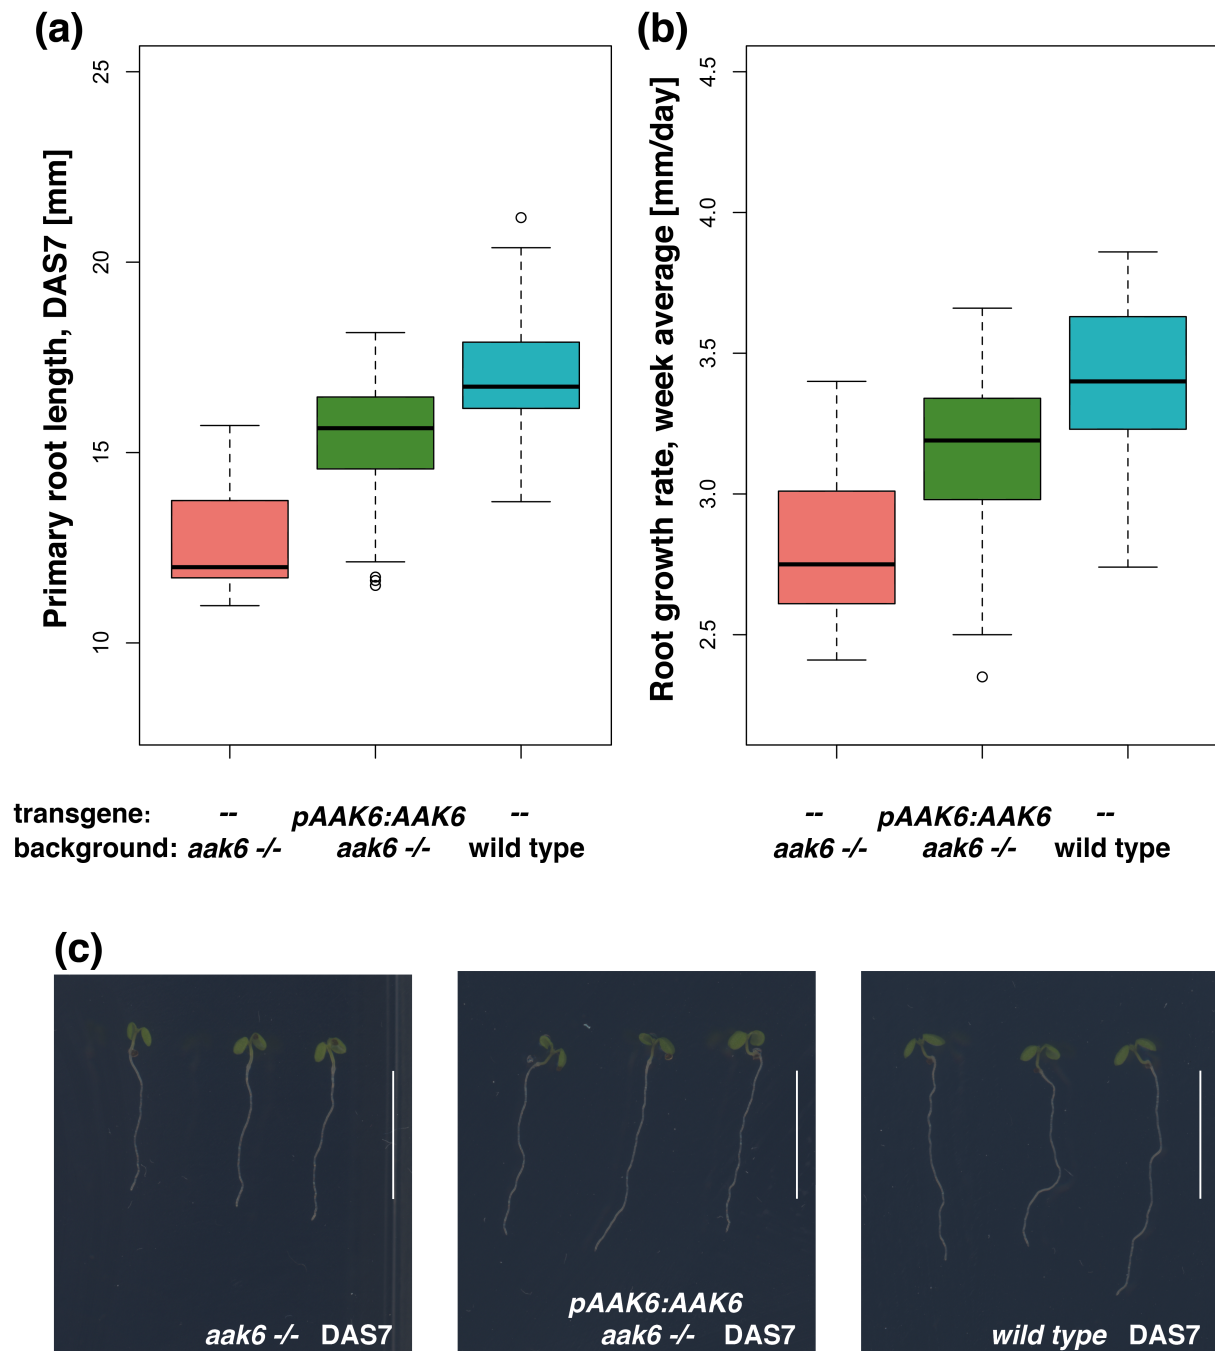

**Fig. S4** Complementation of *aak6 -/-* by *pAAK6: AAK6*, in the root. (a) Primary root length of seedlings on 7th day after stratification. Whiskers represent the last value at a distance smaller than 1.5 times the interquartile range (IQR). (b) Root growth rate of seedlings averaged over 3rd - 7th day after stratification. Whiskers <math>1.5 \times \text{IQR}</math>. (c) Representative examples of seedlings. Scale bar 1 cm.

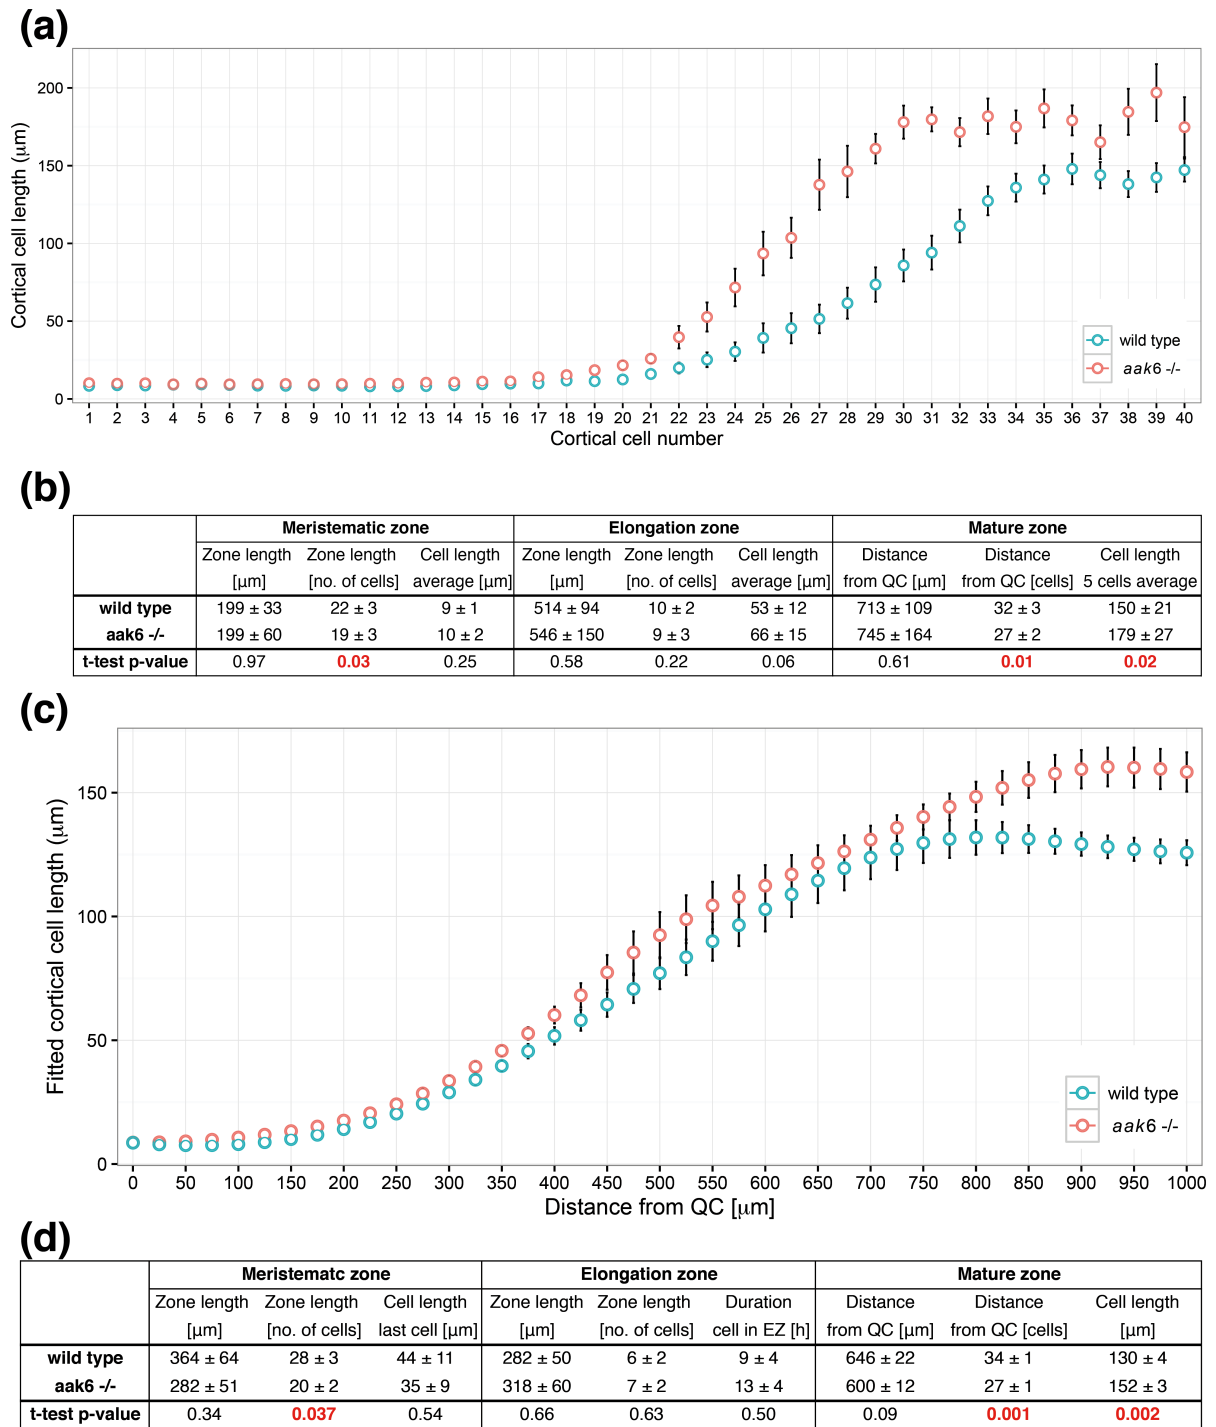

**Fig. S5** Root anatomy parameters of *aak6* *-/-* compared to wild type. Root anatomy parameters evaluated from images taken by confocal microscope on fifth day after stratification: (a) Cortical cell length in relation to cellular distance from the quiescent center (distance in number of cells from QC); mean ± SE. (b) Cellular parameters for meristematic, elongation and mature zones; mean ± SD. P-values significant at alpha = 0.05 are highlighted in red. Root anatomy parameters evaluated from images taken by DIC microscopy on 8th day after stratification: (c) Fitted cortical cell length in relation to physical distance from the quiescent center; mean ± SE. (d) Cellular parameters for meristematic, elongation and mature zone; mean ± SE. P-values significant at alpha = 0.05 are highlighted in red.

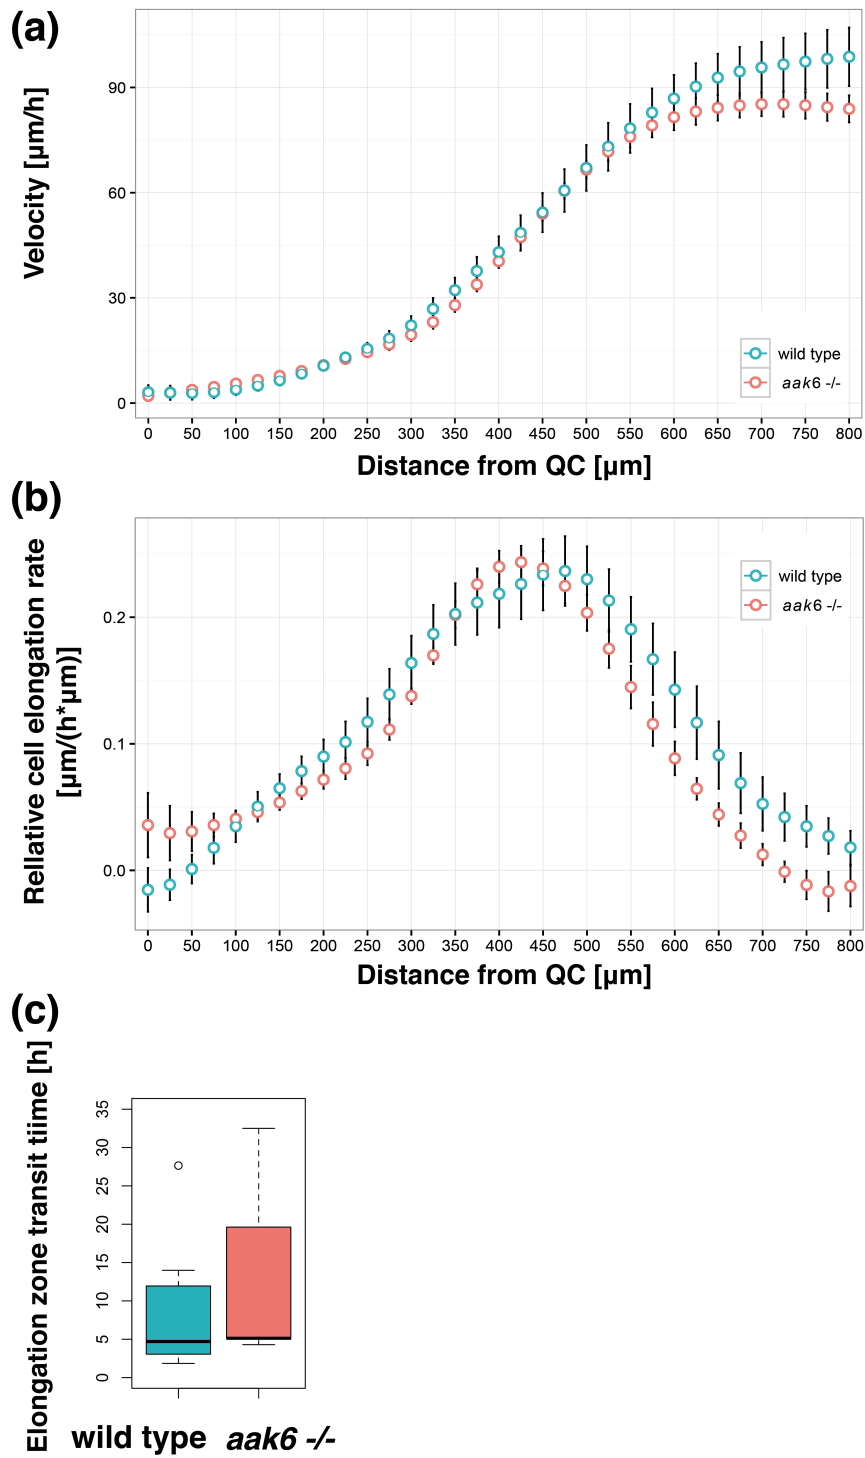

**Fig. S6** Kinematic analysis of root growth. Kinematic analysis of root growth 8th day after stratification. (a) Root growth velocity profile of the wild type and *aak6*  $^{-/-}$  loss-of-function mutant; mean  $\pm$  SE. (b) Relative cell elongation rate of wild type and *aak6*  $^{-/-}$  loss-of-function mutant; mean  $\pm$  SE. (c) Time a cell spends in the elongation zone [h] in wild type and *aak6*  $^{-/-}$  loss-of-function mutant; mean values not significantly different (p-value = 0.50). Whiskers  $< 1.5 \times$  IQR.

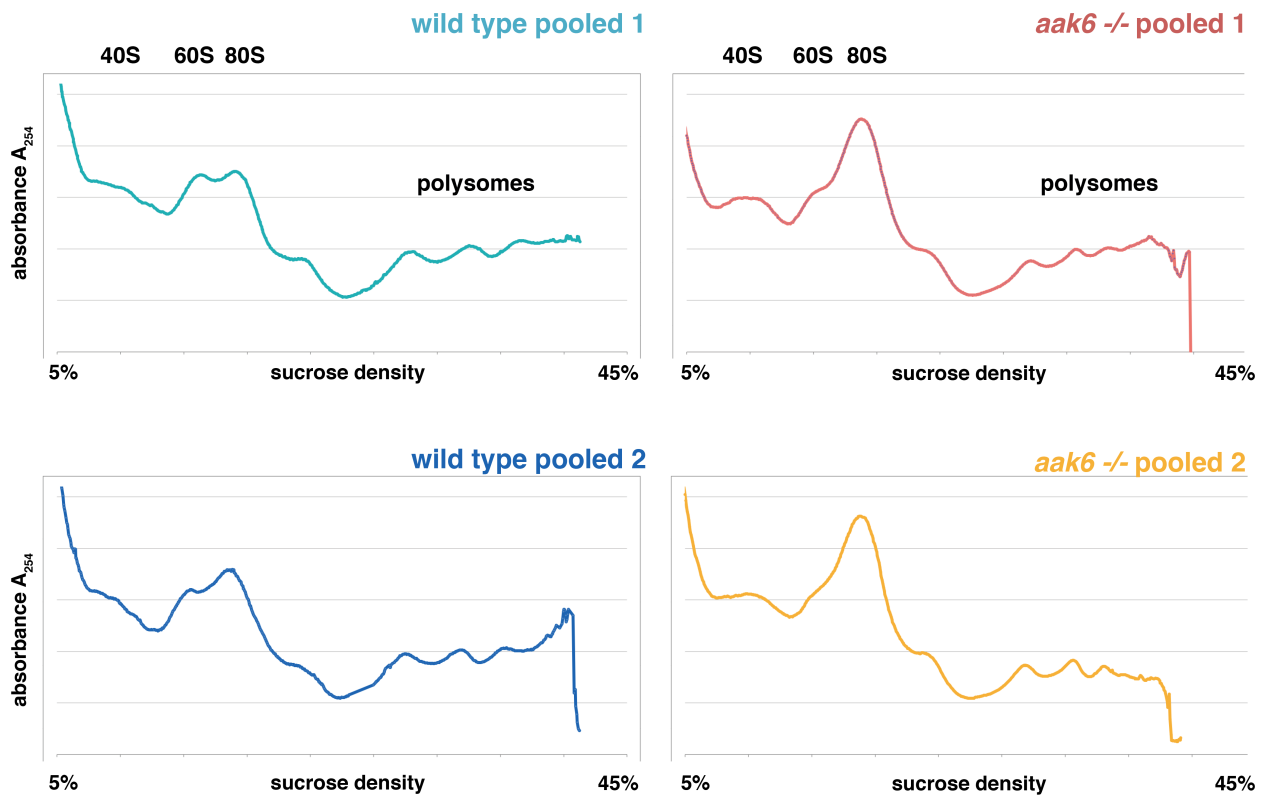

**Fig. S7** Replicates of ribosome/polysome profiles. Spectrophotometric profiles of UV absorbance (254 nm) of sugar gradients. Ribosome/polysomal extracts were obtained from 3-week-old whole seedlings. Ribosomes were fractionated through 5-45% (w/V) sucrose gradient by 2.5 hour-long ultracentrifugation.



| ACC_ID | Name      | Origin |
|--------|-----------|--------|
| 86     | CUR-8     | FRA    |
| 96     | LAC-5     | FRA    |
| 149    | LDV-58    | FRA    |
| 204    | MIB-60    | FRA    |
| 224    | MIB-86    | FRA    |
| 236    | MOG-11    | FRA    |
| 262    | PAR-8     | FRA    |
| 266    | RAN       | FRA    |
| 383    | TOU-J-3   | FRA    |
| 394    | VOU-5     | FRA    |
| 461    | EM-183    | UK     |
| 936    | FOR-5     | UK     |
| 1782   | Ker-38    | USA    |
| 1829   | Mdn-1     | USA    |
| 2057   | Map-42    | USA    |
| 2171   | Paw-26    | USA    |
| 2187   | Pent-1    | USA    |
| 2290   | Ste-3     | USA    |
| 2320   | Wilcox-4  | USA    |
| 5719   | Bur-0     | IRL    |
| 5723   | Chr-1     | UK     |
| 5729   | Coc-1     | ESP    |
| 5731   | Crl-1     | UK     |
| 5736   | Ema-1     | UK     |
| 5742   | Frd-1     | UK     |
| 5745   | Hil-1     | UK     |
| 5751   | Kyl-1     | UK     |
| 5752   | Lan-1     | UK     |
| 5837   | Bor-1     | CZE    |
| 6008   | Duk       | CZE    |
| 6016   | Eds-1     | SWE    |
| 6040   | Kni-1     | SWE    |
| 6064   | Nyl-2     | SWE    |
| 6074   | Ör-1      | SWE    |
| 6243   | Tottarp-2 | SWE    |
| 6730   | CIBC-5    | UK     |
| 6897   | Ag-0      | FRA    |
| 6898   | An-1      | BEL    |
| 6899   | Bay-0     | GER    |
| 6903   | Bor-4     | CZE    |
| 6904   | Br-0      | CZE    |
| 6906   | C24       | POR    |

| ACC_ID | Name    | Origin |
|--------|---------|--------|
| 6907   | CIBC-17 | UK     |
| 6909   | Col-0   | USA    |
| 6910   | Ct-1    | ITA    |
| 6911   | Cvi-0   | CPV    |
| 6913   | Eden-2  | SWE    |
| 6915   | Ei-2    | GER    |
| 6916   | Est-1   | RUS    |
| 6918   | Fäb-4   | SWE    |
| 6919   | Ga-0    | GER    |
| 6920   | Got-22  | GER    |
| 6921   | Got-7   | GER    |
| 6922   | Gu-0    | GER    |
| 6923   | HR-10   | UK     |
| 6924   | HR-5    | UK     |
| 6926   | Kin-0   | USA    |
| 6927   | Kno-10  | USA    |
| 6928   | Kno-18  | USA    |
| 6929   | Kondara | TJK    |
| 6930   | Kz-1    | KZ     |
| 6931   | Kz-9    | KZ     |
| 6932   | Ler-1   | GER    |
| 6933   | LL-0    | ESP    |
| 6936   | Lz-0    | FRA    |
| 6937   | Mrk-0   | GER    |
| 6938   | Ms-0    | RUS    |
| 6939   | Mt-0    | LIB    |
| 6940   | Mz-0    | GER    |
| 6942   | Nd-1    | SUI    |
| 6943   | NFA-10  | UK     |
| 6944   | NFA-8   | UK     |
| 6945   | Nok-3   | NLD    |
| 6946   | Oy-0    | NOR    |
| 6951   | Pu2-23  | CZE    |
| 6956   | Pu2-7   | CZE    |
| 6958   | Ra-0    | FRA    |
| 6959   | Ren-1   | FRA    |
| 6960   | Ren-11  | FRA    |
| 6961   | Se-0    | ESP    |
| 6962   | Sha     | TJK    |
| 6963   | Sorbo   | TJK    |
| 6965   | Spr1-6  | SWE    |
| 6966   | Sq-1    | UK     |

| ACC_ID | Name    | Origin |
|--------|---------|--------|
| 6967   | Sq-8    | UK     |
| 6968   | Tamm-2  | FIN    |
| 6969   | Tamm-27 | FIN    |
| 6970   | Ts-1    | ESP    |
| 6971   | Ts-5    | ESP    |
| 6972   | Tsu-1   | JPN    |
| 6973   | Ull2-3  | SWE    |
| 6975   | Uod-1   | AUT    |
| 6976   | Uod-7   | AUT    |
| 6977   | Van-0   | CAN    |
| 6978   | Wa-1    | POL    |
| 6979   | Wei-0   | SUI    |
| 6980   | Ws-0    | RUS    |
| 6981   | Ws-2    | RUS    |
| 6982   | Wt-5    | GER    |
| 6983   | Yo-0    | USA    |
| 6984   | Zdr-1   | CZE    |
| 6985   | Zdr-6   | CZE    |
| 6987   | Ak-1    | GER    |
| 6990   | Amel-1  | NLD    |
| 6992   | Ang-0   | BEL    |
| 6994   | Ann-1   | FRA    |
| 6998   | Arby-1  | SWE    |
| 7000   | Aa-0    | GER    |
| 7002   | Baa-1   | NLD    |
| 7004   | Bs-2    | SUI    |
| 7008   | 7008    | NL     |
| 7014   | Ba-1    | UK     |
| 7015   | Bla-1   | ESP    |
| 7026   | Boot-1  | UK     |
| 7028   | Bch-1   | GER    |
| 7031   | Bsch-0  | GER    |
| 7062   | Ca-0    | GER    |
| 7071   | Chat-1  | FRA    |
| 7075   | Cit-0   | FRA    |
| 7081   | Co      | POR    |
| 7092   | Com-1   | FRA    |
| 7094   | Da-0    | GER    |
| 7098   | Di-1    | FRA    |
| 7102   | Do-0    | GER    |
| 7123   | Ep-0    | GER    |
| 7126   | Es-0    | FIN    |

| ACC_ID | Name      | Origin |
|--------|-----------|--------|
| 7143   | Gel-1     | NLD    |
| 7147   | Gie-0     | GER    |
| 7163   | Ha-0      | GER    |
| 7166   | Hey-1     | NLD    |
| 7169   | Hh-0      | GER    |
| 7172   | Hi-3      | GER    |
| 7176   | Is-1      | GER    |
| 7178   | Jm-1      | CZE    |
| 7181   | Je-0      | GER    |
| 7192   | Kil-0     | UK     |
| 7199   | Kl-5      | GER    |
| 7201   | Kr-0      | GER    |
| 7205   | Krot-2    | GER    |
| 7210   | La-1      | GER    |
| 7224   | Li-3      | GER    |
| 7231   | Li-7      | GER    |
| 7242   | Lo-2      | GER    |
| 7244   | Mnz-0     | GER    |
| 7246   | Ma-2      | GER    |
| 7252   | Mc-0      | UK     |
| 7255   | Mh-0      | POL    |
| 7262   | Nw-4      | GER    |
| 7268   | Np-0      | GER    |
| 7275   | No-0      | GER    |
| 7276   | Ob-0      | GER    |
| 7280   | Old-1     | GER    |
| 7283   | Ors-1     | ROM    |
| 7287   | Ove-0     | GER    |
| 7291   | Pa-2      | ITA    |
| 7297   | Pf-0      | GER    |
| 7299   | Pi-2      | AUT    |
| 7300   | Pla-0     | ESP    |
| 7306   | Pog-0     | CAN    |
| 7307   | Pn-0      | FRA    |
| 7309   | Po-1      | GER    |
| 7310   | Pr-0      | GER    |
| 7316   | Rhen-1    | NLD    |
| 7317   | Ri-0      | CAN    |
| 7320   | Rou-0     | FRA    |
| 7330   | Sapporo-0 | JPN    |
| 7331   | Sh-0      | GER    |
| 7337   | Si-0      | GER    |

| ACC_ID | Name       | Origin | ACC_ID | Name           | Origin |
|--------|------------|--------|--------|----------------|--------|
| 7344   | Sg-1       | GER    | 8259   | Bå5-1          | SWE    |
| 7351   | Ty-0       | UK     | 8265   | Blh-1          | CZE    |
| 7352   | Te-0       | FIN    | 8270   | Bs-1           | SUI    |
| 7353   | Tha-1      | NLD    | 8271   | Bu-0           | GER    |
| 7354   | Ting-1     | SWE    | 8274   | Can-0          | ESP    |
| 7355   | Tiv-1      | ITA    | 8284   | Drall-1        | CZE    |
| 7372   | Tscha-1    | AUT    | 8285   | Drall-1        | CZE    |
| 7378   | Uk-1       | GER    | 8290   | En-1           | GER    |
| 7382   | Utrecht    | NLD    | 8296   | Gd-1           | GER    |
| 7384   | Ven-1      | NLD    | 8297   | Ge-0           | SUI    |
| 7404   | Wc-1       | GER    | 8300   | Gr-1           | AUT    |
| 7418   | Zu-1       | SUI    | 8304   | Hi-0           | NLD    |
| 7424   | Jl-3       | CZE    | 8306   | Hov4-1         | SWE    |
| 7438   | N13        | RUS    | 8310   | Hs-0           | GER    |
| 7477   | WAR        | USA    | 8311   | In-0           | AUT    |
| 7514   | RRS-7      | USA    | 8312   | Is-0           | GER    |
| 7515   | RRS-10     | USA    | 8313   | Jm-0           | CZE    |
| 7516   | Vår2-1     | SWE    | 8314   | Ka-0           | AUT    |
| 7519   | ÖMö2-3     | SWE    | 8325   | Lip-0          | POL    |
| 7520   | Lp2-2      | CZE    | 8329   | Lm-2           | FRA    |
| 7521   | Lp2-6      | CZE    | 8334   | Lu-1           | SWE    |
| 7522   | Mr-0       | ITA    | 8343   | Na-1           | FRA    |
| 7523   | Pna-17     | USA    | 8348   | Nw-0           | GER    |
| 7524   | Rmx-A02    | USA    | 8351   | Ost-0          | SWE    |
| 7525   | Rmx-A180   | USA    | 8353   | Pa-1           | ITA    |
| 7526   | Pna-10     | USA    | 8354   | Per-1          | RUS    |
| 8213   | Pro-0      | ESP    | 8365   | Rak-2          | CZE    |
| 8214   | Gy-0       | FRA    | 8366   | Rd-0           | GER    |
| 8215   | Fei-0      | POR    | 8369   | Rev-1          | SWE    |
| 8230   | Algutsum   | SWE    | 8374   | Rsch-4         | RUS    |
| 8231   | Brö1-6     | SWE    | 8376   | Sanna-2        | SWE    |
| 8233   | Dem-4      | USA    | 8378   | Sap-0          | CZE    |
| 8236   | HSm        | CZE    | 8387   | St-0           | SWE    |
| 8239   | Köln       | GER    | 8388   | Stw-0          | RUS    |
| 8240   | Kulturen-1 | SWE    | 8395   | Tu-0           | ITA    |
| 8241   | Liarum     | SWE    | 8420   | Kelsterbach-4  | GER    |
| 8243   | PHW-2      | ITA    | 9104   | Lag1-6         | GEO    |
| 8245   | Seattle-0  | USA    | 9152   | Cala-8         | ESP    |
| 8247   | San-2      | SWE    | 9165   | Truk-5         | UKR    |
| 8249   | Vimmerby   | SWE    | 9302   | Edinburgh-5    | UK     |
| 8256   | Bå1-2      | SWE    | 9308   | Ullapool-3     | UK     |
| 8258   | Bå4-1      | SWE    | 100000 | Wil-1-Dean-Lab | LTU    |

**Table S1** 252 *Arabidopsis thaliana* accessions used in this study.

| Seed batch | SALK ID     | Position          | Target gene         | T-DNA presence | Primary root length (Total root length trait) |       |       |       |       | Root growth rate |         |         |         |                 | Relative root growth rate |         |         |         |                 |
|------------|-------------|-------------------|---------------------|----------------|-----------------------------------------------|-------|-------|-------|-------|------------------|---------|---------|---------|-----------------|---------------------------|---------|---------|---------|-----------------|
|            |             |                   |                     |                | DAS3                                          | DAS4  | DAS 5 | DAS 6 | DAS 7 | DAS 3-4          | DAS 4-5 | DAS 5-6 | DAS 6-7 | DAS 3-7 average | DAS 3-4                   | DAS 4-5 | DAS 5-6 | DAS 6-7 | DAS 3-7 average |
| L0901      | SALK_134312 | UTR5              | AT2G22905           | homozygous     | 0.560                                         | 0.834 | 0.714 | 0.724 | 0.766 | 0.875            | 0.952   | 0.517   | 0.995   | 0.634           | 0.856                     | 0.555   | 0.455   | 0.943   | 0.356           |
| L0905      | SALK_134312 | UTR5              | AT2G22905           | homozygous     | 0.059                                         | 0.319 | 0.546 | 0.935 | 0.692 | 0.732            | 0.535   | 0.638   | 0.437   | 0.207           | 0.109                     | 0.191   | 0.540   | 0.286   | 0.396           |
| L1001      | SALK_131000 | UTR3/promotor     | AT2G22905/AT2G22910 | homozygous     | 0.047                                         | 0.005 | 0.001 | 0.000 | 0.004 | 0.012            | 0.042   | 0.074   | 0.285   | 0.004           | 0.241                     | 0.229   | 0.619   | 0.283   | 0.701           |
| L1007      | SALK_131000 | UTR3/promotor     | AT2G22905/AT2G22910 | homozygous     | 0.007                                         | 0.012 | 0.092 | 0.048 | 0.169 | 0.641            | 0.817   | 0.480   | 0.303   | 0.182           | 0.028                     | 0.061   | 0.292   | 0.527   | 0.295           |
| L1103      | SALK_124797 | UTR3/promotor     | AT2G22905/AT2G22910 | homozygous     | 0.028                                         | 0.016 | 0.073 | 0.048 | 0.176 | 0.494            | 0.556   | 0.613   | 0.934   | 0.560           | 0.026                     | 0.017   | 0.094   | 0.338   | 0.065           |
| L1106      | SALK_124797 | UTR3/promotor     | AT2G22905/AT2G22910 | homozygous     | 0.000                                         | 0.003 | 0.002 | 0.006 | 0.016 | 0.213            | 0.624   | 0.851   | 0.742   | 0.378           | 0.018                     | 0.014   | 0.015   | 0.135   | 0.024           |
| L1304      | SALK_004190 | UTR5              | AT2G22920           | homozygous     | 0.063                                         | 0.496 | 0.160 | 0.809 | 0.571 | 0.744            | 0.685   | 0.611   | 0.781   | 0.646           | 0.019                     | 0.411   | 0.413   | 0.306   | 0.442           |
| L1310      | SALK_004190 | UTR5              | AT2G22920           | homozygous     | 0.240                                         | 0.039 | 0.894 | 0.056 | 0.060 | 0.201            | 0.667   | 0.045   | 0.293   | 0.075           | 0.750                     | 0.449   | 0.141   | 0.504   | 0.330           |
| L2202      | SALK_015289 | UTR5              | AT5G60340           | homozygous     | 0.000                                         | 0.000 | 0.000 | 0.002 | NA    | 0.015            | 0.684   | 0.770   | NA      | 0.598           | 0.005                     | 0.004   | 0.002   | NA      | 0.031           |
| L2203      | SALK_015289 | UTR5              | AT5G60340           | homozygous     | 0.000                                         | 0.000 | 0.000 | 0.000 | 0.000 | 0.030            | 0.937   | 0.692   | 0.012   | 0.088           | 0.001                     | 0.001   | 0.005   | 0.019   | 0.005           |
| L2303      | SALK_061336 | promotor/promotor | AT5G60340/AT5G60350 | homozygous     | 0.536                                         | 0.927 | 0.283 | 0.885 | 0.347 | 0.486            | 0.104   | 0.515   | 0.622   | 0.492           | 0.355                     | 0.156   | 0.385   | 0.720   | 0.468           |
| L2305      | SALK_061336 | promotor/promotor | AT5G60340/AT5G60350 | homozygous     | 0.257                                         | 0.683 | 0.396 | 0.209 | 0.244 | 0.025            | 0.145   | 0.029   | 0.529   | 0.017           | 0.016                     | 0.438   | 0.110   | 0.855   | 0.145           |
| L2401      | SALK_088228 | UTR5              | AT5G60350           | homozygous     | 0.057                                         | 0.011 | 0.357 | 0.009 | 0.102 | 0.040            | 0.386   | 0.465   | 0.128   | 0.214           | 0.161                     | 0.096   | 0.358   | 0.473   | 0.891           |
| L2402      | SALK_088228 | UTR5              | AT5G60350           | homozygous     | 0.434                                         | 0.159 | 0.200 | 0.131 | 0.165 | 0.158            | 0.970   | 0.468   | 0.351   | 0.675           | 0.654                     | 0.180   | 0.036   | 0.966   | 0.677           |

**Table S2** Phenotypes of T-DNA insertion mutant lines (t-test p-values). Bonferroni corrected significance threshold for multiple testing: alpha = 0.0033 (15 t-tests). P-values significant at this corrected threshold are highlighted in red.

| ID  | code                    | target                | sequence (5'-3')                                  |
|-----|-------------------------|-----------------------|---------------------------------------------------|
| P1  | LBa1                    | T-DNA                 | TGGTTCACGTAGTGGCCATCG                             |
| P2  | SALK_134312_left        | AT2G22905             | AGATTCCATTACGCACACCTG                             |
| P3  | SALK_134312_right       | AT2G22905             | CTCCGTTGTGCGAAGAAGACAC                            |
| P4  | SALK_131000_left        | AT2G22905, AT2G22910  | TTTTGTTTGGAAATGCGTTTTTC                           |
| P5  | SALK_131000_right       | AT2G22905, AT2G22910  | ACACTCGTGAACCGGTATTTG                             |
| P6  | SALK_124797_left        | AT2G22910             | GTGTC TTCTTCGACAACGGAG                            |
| P7  | SALK_124797_right       | AT2G22910             | AAACACCTTGCGTGCATAAAC                             |
| P8  | SALK_004190_left        | AT2G22920             | TTCCAACGCTATAGTGGCATC                             |
| P9  | SALK_004190_right       | AT2G22920             | GGTTTCGAGTTCGAAAGGAAG                             |
| P10 | SALK_015289_left        | AT5G60340             | CCCTATGGCAAATCACAATG                              |
| P11 | SALK_015289_right       | AT5G60340             | GTCACAGCCATGGTAGTCCAC                             |
| P12 | SALK_061336_left        | AT5G60340, AT5G60350  | CTACCTTGTTTTTGTGCTG                               |
| P13 | SALK_061336_right       | AT5G60340, AT5G60350  | CGGTAGTGAACAACAACACC                              |
| P14 | SALK_088228_left        | AT5G60350             | TTTGTGATTTGCCATAGGGAG                             |
| P15 | SALK_088228_right       | AT5G60350             | TTGTTGTCTTCCACCAAAGG                              |
| P16 | 35S_Infusion_FW         | 35S, pGreen0299       | CGGTATCGATAAGCTTAACATGGTGGAGCAGC                  |
| P17 | 35S_Infusion_RV         | pGreen0229, 35S       | CTGCAGGAATTCGATATCCTATCGTTCGTAATGGTGA             |
| P18 | Infusion_FW_AAK6_pGreen | 35S, AT5G60340        | TACGAACGATAGGATGAAGACCGAATCGGCGAGA                |
| P19 | Infusion_RV_AAK6_pGreen | pGreen0229, AT5G60340 | GACGTCCTTAAGCTACTAGTAGTCCCAACGGTACG               |
| P20 | Infusion_gAAK6_forward  | AT5G60340, pGreen0229 | CGGTATCGATAAGCTTGTGATGTCCCCCATTTGTTG              |
| P21 | Infusion_gAAK6_reverse  | AT5G60340, pGreen0229 | CTGCAGGAATTCGATATCGCTTGAAGGATGTGTATGATCCAG        |
| P22 | ATTB4_AAK6              | AT5G60340             | GGGGACAACCTTGTATAGAAAAGTTCGGGTGATGTCCCCATTGT      |
| P23 | ATTB1rev_AAK6           | AT5G60340             | GGGGACTGCTTTTTGTACAAACTTGCTctctatgaagcctgaagaaatt |
| P24 | ATTB1_AAK6              | AT5G60340             | GGGGACAAGTTTGTACAAAAAAGCAGGCTTCAGAAGACCGAATCGGCGA |
| P25 | ATTB2_AAK6              | AT5G60340             | GGGGACCACCTTGTACAAAGAAAGTGGGTTGGTTGCCATGCATTAATCC |
| P26 | Tubulin2_Exon1_forward  | AT5G62690             | GGCGCCAAGTCTCTGGGAAGTGG                           |
| P27 | Tubulin2_Exon1_reverse  | AT5G62690             | CCATGAGCACTGCACGAGGAACG                           |
| P28 | AAK6_Exon2_forward      | AT5G60340             | TGCTATGATAGAAGGAGGGAACA                           |
| P29 | AAK6_Exon2_reverse      | AT5G60340             | TAAACGGTCAACAAAACGGAGT                            |

**Table S3** Primers used in this study.

| Trait                               | standard deviation          |                  | standard deviation [mm] |                  | heritability |                  | Pearson's r                 | Pearson's r               |                             |
|-------------------------------------|-----------------------------|------------------|-------------------------|------------------|--------------|------------------|-----------------------------|---------------------------|-----------------------------|
|                                     | median SD within accessions |                  | between accessions      |                  |              |                  | trait <sub>random</sub> vs. | accession's seed area vs. |                             |
|                                     | random seeds                | controlled seeds | random seeds            | controlled seeds | random seeds | controlled seeds | trait <sub>controlled</sub> | trait <sub>random</sub>   | trait <sub>controlled</sub> |
| Total_length_DAS3 [mm]              | 1.0                         | 0.9              | 1.1                     | 0.8              | 0.44         | 0.43             | 0.71                        | 0.20                      | 0.03                        |
| Total_length_DAS4 [mm]              | 1.5                         | 1.1              | 1.6                     | 1.3              | 0.50         | 0.50             | 0.76                        | 0.33                      | 0.06                        |
| Total_length_DAS5 [mm]              | 1.8                         | 1.3              | 2.0                     | 1.6              | 0.49         | 0.51             | 0.74                        | 0.39                      | 0.08                        |
| Total_length_DAS6 [mm]              | 2.2                         | 1.5              | 2.5                     | 1.9              | 0.50         | 0.51             | 0.74                        | 0.43                      | 0.11                        |
| Total_length_DAS7 [mm]              | 2.6                         | 1.8              | 2.9                     | 2.3              | 0.49         | 0.50             | 0.75                        | 0.43                      | 0.14                        |
| Euclidian_length_DAS3 [mm]          | 0.9                         | 0.8              | 1.0                     | 0.8              | 0.45         | 0.43             | 0.72                        | 0.21                      | 0.03                        |
| Euclidian_length_DAS4 [mm]          | 1.4                         | 1.0              | 1.5                     | 1.2              | 0.51         | 0.49             | 0.75                        | 0.33                      | 0.07                        |
| Euclidian_length_DAS5 [mm]          | 1.7                         | 1.2              | 1.9                     | 1.5              | 0.49         | 0.51             | 0.74                        | 0.39                      | 0.09                        |
| Euclidian_length_DAS6 [mm]          | 2.0                         | 1.4              | 2.3                     | 1.8              | 0.50         | 0.50             | 0.73                        | 0.43                      | 0.11                        |
| Euclidian_length_DAS7 [mm]          | 2.4                         | 1.7              | 2.7                     | 2.2              | 0.49         | 0.50             | 0.74                        | 0.43                      | 0.14                        |
| Root_tortuosity_DAS3                | 0.04                        | 0.04             | 0.0                     | 0.0              | 0.08         | 0.07             | 0.21                        | -0.10                     | -0.02                       |
| Root_tortuosity_DAS4                | 0.05                        | 0.04             | 0.1                     | 0.0              | 0.03         | 0.06             | 0.14                        | -0.02                     | 0.05                        |
| Root_tortuosity_DAS5                | 0.04                        | 0.03             | 0.0                     | 0.0              | 0.04         | 0.08             | 0.34                        | 0.00                      | 0.00                        |
| Root_tortuosity_DAS6                | 0.04                        | 0.03             | 0.0                     | 0.0              | 0.04         | 0.09             | 0.32                        | -0.03                     | -0.02                       |
| Root_tortuosity_DAS7                | 0.03                        | 0.03             | 0.0                     | 0.0              | 0.08         | 0.12             | 0.48                        | -0.08                     | -0.04                       |
| Root_tortuosity_avg                 | 0.04                        | 0.03             | 0.0                     | 0.0              | 0.03         | 0.09             | 0.29                        | -0.05                     | 0.00                        |
| Root_growth_rate_DAS3-DAS4 [mm]     | 0.6                         | 0.4              | 0.7                     | 0.5              | 0.50         | 0.48             | 0.73                        | 0.44                      | 0.21                        |
| Root_growth_rate_DAS4-DAS5 [mm]     | 0.5                         | 0.4              | 0.6                     | 0.4              | 0.44         | 0.44             | 0.70                        | 0.41                      | 0.16                        |
| Root_growth_rate_DAS5-DAS6 [mm]     | 0.5                         | 0.4              | 0.6                     | 0.5              | 0.47         | 0.46             | 0.77                        | 0.43                      | 0.21                        |
| Root_growth_rate_DAS6-DAS7 [mm]     | 0.6                         | 0.5              | 0.6                     | 0.5              | 0.44         | 0.41             | 0.70                        | 0.30                      | 0.18                        |
| Root_growth_rate_avg [mm]           | 0.5                         | 0.4              | 0.6                     | 0.4              | 0.45         | 0.50             | 0.76                        | 0.44                      | 0.21                        |
| Relative_root_growth_rate_DAS3-DAS4 | 0.4                         | 0.5              | 1.2                     | 1.3              | 0.12         | 0.23             | 0.60                        | 0.03                      | 0.01                        |
| Relative_root_growth_rate_DAS4-DAS5 | 0.1                         | 0.1              | 0.3                     | 0.4              | 0.22         | 0.15             | 0.60                        | -0.08                     | 0.12                        |
| Relative_root_growth_rate_DAS5-DAS6 | 0.1                         | 0.1              | 0.1                     | 0.1              | 0.13         | 0.19             | 0.80                        | 0.02                      | 0.08                        |
| Relative_root_growth_rate_DAS6-DAS7 | 0.0                         | 0.0              | 0.1                     | 0.1              | 0.18         | 0.26             | 0.56                        | -0.18                     | 0.11                        |
| Relative_root_growth_rate_avg       | 0.2                         | 0.2              | 0.3                     | 0.3              | 0.13         | 0.18             | 0.69                        | -0.03                     | 0.04                        |
| Root_angle_DAS3                     | 12.0                        | 11.0             | 5.1                     | 3.7              | 0.01         | 0.01             | -0.09                       | 0.07                      | -0.02                       |
| Root_angle_DAS4                     | 9.2                         | 8.4              | 4.7                     | 4.2              | 0.04         | 0.07             | 0.33                        | -0.01                     | -0.06                       |
| Root_angle_DAS5                     | 7.2                         | 6.7              | 4.8                     | 4.3              | 0.08         | 0.18             | 0.56                        | -0.05                     | -0.07                       |
| Root_angle_DAS6                     | 5.9                         | 5.7              | 4.2                     | 4.5              | 0.18         | 0.28             | 0.73                        | -0.05                     | -0.03                       |
| Root_angle_DAS7                     | 5.4                         | 5.1              | 4.2                     | 4.7              | 0.25         | 0.35             | 0.75                        | -0.03                     | -0.03                       |
| Root_angle_avg                      | 7.6                         | 6.9              | 4.1                     | 3.8              | 0.06         | 0.14             | 0.48                        | 0.03                      | -0.04                       |
| Root_direction_index_DAS3           | 0.14                        | 0.13             | 0.1                     | 0.1              | 0.08         | 0.09             | 0.37                        | -0.07                     | 0.04                        |
| Root_direction_index_DAS4           | 0.11                        | 0.11             | 0.1                     | 0.1              | 0.15         | 0.12             | 0.50                        | -0.05                     | -0.05                       |
| Root_direction_index_DAS5           | 0.09                        | 0.08             | 0.1                     | 0.1              | 0.22         | 0.20             | 0.62                        | -0.01                     | -0.07                       |
| Root_direction_index_DAS6           | 0.08                        | 0.07             | 0.1                     | 0.1              | 0.31         | 0.25             | 0.61                        | -0.08                     | -0.05                       |
| Root_direction_index_DAS7           | 0.07                        | 0.07             | 0.1                     | 0.1              | 0.35         | 0.28             | 0.59                        | -0.12                     | -0.07                       |
| Root_direction_index_avg            | 0.09                        | 0.08             | 0.1                     | 0.1              | 0.20         | 0.17             | 0.56                        | -0.08                     | -0.05                       |
| Root_horizontal_index_DAS3 [mm]     | 0.1                         | 0.1              | 0.1                     | 0.1              | 0.13         | 0.16             | 0.64                        | 0.19                      | 0.05                        |
| Root_horizontal_index_DAS4 [mm]     | 0.2                         | 0.1              | 0.1                     | 0.1              | 0.16         | 0.15             | 0.67                        | 0.26                      | -0.04                       |
| Root_horizontal_index_DAS5 [mm]     | 0.2                         | 0.2              | 0.1                     | 0.1              | 0.24         | 0.22             | 0.75                        | 0.23                      | -0.03                       |
| Root_horizontal_index_DAS6 [mm]     | 0.2                         | 0.2              | 0.2                     | 0.2              | 0.34         | 0.32             | 0.83                        | 0.21                      | 0.01                        |
| Root_horizontal_index_DAS7 [mm]     | 0.3                         | 0.2              | 0.3                     | 0.2              | 0.40         | 0.39             | 0.84                        | 0.19                      | 0.01                        |
| Root_horizontal_index_avg [mm]      | 0.2                         | 0.1              | 0.1                     | 0.1              | 0.26         | 0.27             | 0.77                        | 0.26                      | 0.00                        |
| Root_vertical_index_DAS3 [mm]       | 0.3                         | 0.2              | 0.3                     | 0.2              | 0.44         | 0.41             | 0.71                        | 0.20                      | 0.03                        |
| Root_vertical_index_DAS4 [mm]       | 0.4                         | 0.3              | 0.4                     | 0.3              | 0.49         | 0.49             | 0.75                        | 0.33                      | 0.07                        |
| Root_vertical_index_DAS5 [mm]       | 0.5                         | 0.4              | 0.5                     | 0.4              | 0.48         | 0.51             | 0.74                        | 0.39                      | 0.09                        |
| Root_vertical_index_DAS6 [mm]       | 0.6                         | 0.4              | 0.7                     | 0.5              | 0.49         | 0.50             | 0.73                        | 0.42                      | 0.11                        |
| Root_vertical_index_DAS7 [mm]       | 0.7                         | 0.5              | 0.8                     | 0.6              | 0.49         | 0.50             | 0.75                        | 0.43                      | 0.15                        |
| Root_vertical_index_avg [mm]        | 0.7                         | 0.5              | 0.5                     | 0.4              | 0.33         | 0.35             | 0.70                        | 0.41                      | 0.11                        |
| Root_linearity_DAS3                 | 0.32                        | 0.32             | 0.1                     | 0.1              | 0.02         | 0.02             | 0.03                        | 0.18                      | 0.05                        |
| Root_linearity_DAS4                 | 0.32                        | 0.32             | 0.1                     | 0.1              | 0.02         | 0.03             | 0.11                        | 0.10                      | -0.03                       |
| Root_linearity_DAS5                 | 0.32                        | 0.31             | 0.1                     | 0.1              | 0.04         | 0.05             | 0.24                        | -0.02                     | -0.02                       |
| Root_linearity_DAS6                 | 0.30                        | 0.31             | 0.1                     | 0.1              | 0.09         | 0.09             | 0.44                        | 0.04                      | 0.07                        |
| Root_linearity_DAS7                 | 0.30                        | 0.30             | 0.1                     | 0.1              | 0.13         | 0.15             | 0.54                        | 0.03                      | 0.06                        |
| Root_linearity_avg                  | 0.22                        | 0.21             | 0.1                     | 0.1              | 0.06         | 0.09             | 0.30                        | 0.11                      | 0.03                        |
| Average_root_width_DAS3 [mm]        | 0.014                       | 0.013            | 0.0                     | 0.0              | 0.13         | 0.09             | 0.41                        | 0.27                      | 0.05                        |
| Average_root_width_DAS4 [mm]        | 0.011                       | 0.009            | 0.0                     | 0.0              | 0.17         | 0.14             | 0.59                        | 0.37                      | 0.19                        |
| Average_root_width_DAS5 [mm]        | 0.009                       | 0.007            | 0.0                     | 0.0              | 0.16         | 0.17             | 0.63                        | 0.44                      | 0.19                        |
| Average_root_width_DAS6 [mm]        | 0.010                       | 0.007            | 0.0                     | 0.0              | 0.23         | 0.44             | -0.03                       | 0.26                      | 0.12                        |
| Average_root_width_DAS7 [mm]        | 0.009                       | 0.007            | 0.0                     | 0.0              | 0.24         | 0.41             | 0.70                        | 0.25                      | 0.15                        |
| Average_root_width_avg [mm]         | 0.010                       | 0.008            | 0.0                     | 0.0              | 0.16         | 0.20             | 0.57                        | 0.39                      | 0.18                        |
| Root_width_20_DAS3 [mm]             | 0.035                       | 0.035            | 0.0                     | 0.0              | 0.08         | 0.05             | 0.29                        | 0.02                      | -0.13                       |
| Root_width_20_DAS4 [mm]             | 0.026                       | 0.027            | 0.0                     | 0.0              | 0.11         | 0.08             | 0.38                        | 0.11                      | -0.08                       |
| Root_width_20_DAS5 [mm]             | 0.021                       | 0.021            | 0.0                     | 0.0              | 0.11         | 0.11             | 0.56                        | 0.09                      | -0.01                       |
| Root_width_20_DAS6 [mm]             | 0.018                       | 0.018            | 0.0                     | 0.0              | 0.13         | 0.21             | 0.42                        | 0.09                      | 0.00                        |
| Root_width_20_DAS7 [mm]             | 0.017                       | 0.017            | 0.0                     | 0.0              | 0.20         | 0.24             | 0.76                        | 0.07                      | -0.03                       |
| Root_width_20_avg [mm]              | 0.022                       | 0.022            | 0.0                     | 0.0              | 0.11         | 0.11             | 0.60                        | 0.10                      | -0.03                       |
| Root_width_40_DAS3 [mm]             | 0.021                       | 0.022            | 0.0                     | 0.0              | 0.12         | 0.07             | 0.46                        | 0.12                      | -0.02                       |
| Root_width_40_DAS4 [mm]             | 0.013                       | 0.013            | 0.0                     | 0.0              | 0.15         | 0.16             | 0.65                        | 0.30                      | 0.19                        |
| Root_width_40_DAS5 [mm]             | 0.011                       | 0.008            | 0.0                     | 0.0              | 0.17         | 0.17             | 0.69                        | 0.41                      | 0.18                        |
| Root_width_40_DAS6 [mm]             | 0.011                       | 0.008            | 0.0                     | 0.0              | 0.18         | 0.39             | 0.06                        | 0.32                      | 0.15                        |
| Root_width_40_DAS7 [mm]             | 0.010                       | 0.007            | 0.0                     | 0.0              | 0.20         | 0.34             | 0.66                        | 0.34                      | 0.17                        |
| Root_width_40_avg [mm]              | 0.011                       | 0.010            | 0.0                     | 0.0              | 0.16         | 0.17             | 0.60                        | 0.35                      | 0.17                        |
| Root_width_60_DAS3 [mm]             | 0.013                       | 0.013            | 0.0                     | 0.0              | 0.16         | 0.10             | 0.55                        | 0.31                      | 0.12                        |
| Root_width_60_DAS4 [mm]             | 0.011                       | 0.009            | 0.0                     | 0.0              | 0.17         | 0.17             | 0.69                        | 0.39                      | 0.27                        |
| Root_width_60_DAS5 [mm]             | 0.010                       | 0.007            | 0.0                     | 0.0              | 0.18         | 0.16             | 0.59                        | 0.47                      | 0.25                        |
| Root_width_60_DAS6 [mm]             | 0.010                       | 0.007            | 0.0                     | 0.0              | 0.23         | 0.39             | -0.08                       | 0.30                      | 0.16                        |
| Root_width_60_DAS7 [mm]             | 0.010                       | 0.007            | 0.0                     | 0.0              | 0.19         | 0.36             | 0.61                        | 0.32                      | 0.19                        |
| Root_width_60_avg [mm]              | 0.009                       | 0.007            | 0.0                     | 0.0              | 0.18         | 0.23             | 0.51                        | 0.44                      | 0.23                        |
| Root_width_80_DAS3 [mm]             | 0.012                       | 0.010            | 0.0                     | 0.0              | 0.14         | 0.08             | 0.49                        | 0.45                      | 0.27                        |
| Root_width_80_DAS4 [mm]             | 0.011                       | 0.008            | 0.0                     | 0.0              | 0.17         | 0.14             | 0.55                        | 0.41                      | 0.32                        |
| Root_width_80_DAS5 [mm]             | 0.010                       | 0.007            | 0.0                     | 0.0              | 0.17         | 0.18             | 0.53                        | 0.48                      | 0.25                        |
| Root_width_80_DAS6 [mm]             | 0.010                       | 0.008            | 0.0                     | 0.0              | 0.24         | 0.41             | -0.14                       | 0.25                      | 0.16                        |
| Root_width_80_DAS7 [mm]             | 0.010                       | 0.007            | 0.0                     | 0.0              | 0.20         | 0.36             | 0.53                        | 0.27                      | 0.21                        |
| Root_width_80_avg [mm]              | 0.009                       | 0.006            | 0.0                     | 0.0              | 0.18         | 0.23             | 0.41                        | 0.46                      | 0.27                        |
| Root_width_100_DAS3 [mm]            | 0.012                       | 0.009            | 0.0                     | 0.0              | 0.12         | 0.13             | 0.40                        | 0.50                      | 0.31                        |
| Root_width_100_DAS4 [mm]            | 0.011                       | 0.008            | 0.0                     | 0.0              | 0.13         | 0.13             | 0.51                        | 0.45                      | 0.30                        |
| Root_width_100_DAS5 [mm]            | 0.010                       | 0.007            | 0.0                     | 0.0              | 0.15         | 0.16             | 0.57                        | 0.48                      | 0.24                        |
| Root_width_100_DAS6 [mm]            | 0.010                       | 0.008            | 0.0                     | 0.0              | 0.28         | 0.39             | -0.11                       | 0.20                      | 0.13                        |
| Root_width_100_DAS7 [mm]            | 0.010                       | 0.007            | 0.0                     | 0.0              | 0.19         | 0.37             | 0.48                        | 0.20                      | 0.21                        |
| Root_width_100_avg [mm]             | 0.009                       | 0.006            | 0.0                     | 0.0              | 0.15         | 0.24             | 0.40                        | 0.46                      | 0.28                        |

**Table S4** Impact of seed size on root growth traits. Heritability and correlation of seed area with early root growth traits are compared within a column and assigned shading on a two-color scale (white - green) with higher values highlighted in green.

|      |       |     |                                                               |     |
|------|-------|-----|---------------------------------------------------------------|-----|
| slow | Bå4-1 | 1   | MARRNRGCTRRARPPLLITGTPGTGKSTTAALAEATNLRYICIGDLVKEKEFYHGWDSE   | 60  |
| fast | Col-0 | 1   | MARRNRGVTRRRERPNLLITGTPGTGKSTTASALAEATNLRYICIGDLVKEKEFYHGWDNE | 60  |
|      | Tha-1 | 1   | MARRNRGVTRRRERPNLLITGTPGTGKSTTASALAEATNLRYICIGDLVKEKEFYHGWDNE | 60  |
|      |       |     | ***** **                                                      |     |
| slow | Bå4-1 | 61  | LECHF INEDSVIDELEDDAMIEGGNIVDYHGCDFFPQRWFRVVLRTENSVLYDRLTNRG  | 120 |
| fast | Col-0 | 61  | LECHF INEDSVIDELEDDAMIEGGNIVDYHGCDFFPQRWFRVVLRTENSVLYDRLTNRG  | 120 |
|      | Tha-1 | 61  | LECHF INEDSVIDELEDDAMIEGGNIVDYHGCDFFPQRWFRVVLRTENSVLYDRLTNRG  | 120 |
|      |       |     | *****                                                         |     |
| slow | Bå4-1 | 121 | YSGTKLSNNLQCEMYQVLLLEEAHDSYDEEIVTELOSNTIEDISNNVSTLTDWINAWQF   | 178 |
| fast | Col-0 | 121 | YSGTKLSNNLQCEMYQVLLLEEAHDSYDEEIVTELOSNTIEDISNNVSTLTDWINAWQF   | 178 |
|      | Tha-1 | 121 | YSGTKLSNNLQCEMYQVLLLEEAHDSYDEEIVTELOSNTIEDISNNVSTLTDWINAWQF   | 178 |
|      |       |     | *****                                                         |     |

**Table S6** Alignment of *AAK6* coding sequences (amino acids) of Bå4-1, Col-0, and Tha-1.

|     | Col-0 pooled<br>root tips S1 | Col-0 pooled<br>root tips S2 | Col-0 pooled<br>root tips S3 | Col-0 pooled<br>root tips S4 | Col-0 pooled<br>root tips S5 | Col-0 pooled<br>root tips S6 | Average | Average ploidy<br>class proportion |
|-----|------------------------------|------------------------------|------------------------------|------------------------------|------------------------------|------------------------------|---------|------------------------------------|
| 16C | 1029                         | 966                          | 913                          | 912                          | 937                          | 951                          | 951     | 11%                                |
| 8C  | 2633                         | 2795                         | 2676                         | 2866                         | 2987                         | 2821                         | 2796    | 33%                                |
| 4C  | 3028                         | 2804                         | 2943                         | 2948                         | 2911                         | 2940                         | 2929    | 34%                                |
| 2C  | 1825                         | 1824                         | 1908                         | 1763                         | 1962                         | 1896                         | 1863    | 22%                                |

  

|     | aak6 pooled<br>root tips S1 | aak6 pooled<br>root tips S2 | aak6 pooled<br>root tips S3 | aak6 pooled<br>root tips S4 | aak6 pooled<br>root tips S5 | aak6 pooled<br>root tips S6 | Average | Average ploidy<br>class proportion |
|-----|-----------------------------|-----------------------------|-----------------------------|-----------------------------|-----------------------------|-----------------------------|---------|------------------------------------|
| 16C | 1820                        | 1362                        | 1574                        | 1617                        | 1534                        | 1573                        | 1580    | 18%                                |
| 8C  | 2616                        | 3047                        | 2593                        | 2964                        | 2850                        | 3007                        | 2846    | 33%                                |
| 4C  | 2542                        | 2580                        | 2563                        | 2481                        | 2790                        | 2617                        | 2596    | 30%                                |
| 2C  | 1560                        | 1680                        | 1729                        | 1667                        | 1694                        | 1610                        | 1657    | 19%                                |

**Difference in proportions of ploidy classes in Col-0 vs. *aak6* -/-, t-test p-values:**

|     |              |     |
|-----|--------------|-----|
| 16C | <b>0.000</b> | *** |
| 8C  | 0.617        |     |
| 4C  | <b>0.000</b> | *** |
| 2C  | <b>0.000</b> | *** |

**Table S7** Proportions of nuclear ploidy classes in the root apices. Counts of nuclei in discrete nuclear ploidy classes, fifth day after stratification. Bonferroni corrected significance threshold for multiple testing: alpha = 0.0125 (4 t-tests). P-values significant at this corrected threshold are highlighted in red as well as by "\*\*\*".

## Methods S1

### Relative expression fold change of the *AAK6* gene

We tested the expression of *AAK6* gene (AT5G60340) in Col-0, *aak6* mutant, and 35S:*AAK6* line; *Tubulin 2* (AT5G62690) was used as the reference gene (used primers P26 – P29 are listed in Supplemental Table S3).

Seeds were surface sterilized, stratified and cultured on 1x MS, 1% sucrose, 0.8% agar plates. Seedlings grew until 5th day after stratification. 5 mm root tips were collected, frozen in liquid nitrogen and ground in 1.5 ml Eppendorf tubes using glass beads and Retsch MM 400 mill. Total RNA was extracted by Maxwell 16 LEV simplyRNA Tissue Kit (Promega) including DNase treatment according to manufacturer's instructions. cDNA was generated by two-step RT-PCR: 200 ng of DNase treated RNA and 0.5 µg of Oligo(dT) primer were added on ice to each PCR-tube to a total of 12.5 l DEPC-treated water solution and then incubated at 65 °C, 5 min. RT master mix was prepared from: 2 l of 10 mM dNTP mix, 0.5 l of RiboLock RNase inhibitor, 1 l of RevertAid Reverse Transcriptase (RAT) and 4 l of 5x RAT reaction buffer (all ThermoFisher Scientific) for each sample. 7.5 l of RT master mix was added to template RNA and Oligo(dT) primer. The following RT-PCR program was run in Tetrad 2 PCR thermal cycler (Biorad): 10 min 25 °C, 60 min 42 °C, 10 min 70 °C. The resulting cDNA was analysed immediately by a real-time qPCR. qPCR master mix was prepared from: 12.5 l 2x SensiMix SYBR & Fluorescein Kit (PEQLAB), 0.63 l of 10 M forward and reverse primers for *Tubulin 2* and *AAK6* each. 2.5 l of 2x diluted template cDNA was added to 22.5 l of qPCR master mix in wells on 96-well plate. qPCR was performed on Roche LightCycler 96 as follows: 10 min 95 °C, 40 x (15 s 95 °C, 15 s 58 °C, 15 s 72 °C), 10 s 95 °C, 60 s 65 °C, and 1 s 97 °C. Relative fold-change was evaluated by the delta-delta Ct method using 4 pooled biological by 3 technical replicates for each genotype.

## Methods S2

### Seed size measurements

To assess the correlation of average seed size and BRAT evaluated root growth traits, we measured 2D seed area [mm<sup>2</sup>] from 1600-dpi images scanned by Perfection V600 scanner (Epson). Acquired images were downscaled to 8-bit, threshold (20, 255) and converted to binary mask. Binary images were then analyzed in Fiji using plugin 'Analyze Particles' (inclusion parameters: size = 0.04-0.23 mm<sup>2</sup>, circularity = 0.80-1.00).

Average seed sizes were evaluated for 252 accessions (n > 500 for each).

## Notes S1

### Precautions taken in propagation of natural accessions

To avoid unnecessary maternal effects, we only used seeds harvested from *Arabidopsis thaliana* plants grown under the same conditions in the same growth chamber at the same time.

## Notes S2

### Precautions taken with SALK T-DNA lines

To avoid unnecessary maternal effects, T-DNA plants were propagated side-by-side under the same growth conditions as the control accession Col-0 (Columbia-0). We confirmed the homozygosity of the T-DNA insertion by genotyping (primers are listed in the Supplemental Table S3), cultured and phenotyped the F1 generation of homozygous seedlings side-by-side with the respective control accession Col-0.

## Notes S3

### Increase in endopolyploidy levels accompanies increase in mature cell size in *ak6* mutant

We report larger mature cells and increased endopolyploidy levels in the *ak6* roots. This raises a question whether the additional endocycles are important for post-mitotic compensatory cell enlargement in the root or in other plant organs in general. Increased endopolyploidy levels have long been associated with increased cell sizes (reviewed in (Sugimoto-Shirasu and Roberts, 2003)). While it has been reported that endopolyploidization can precede rapid cell elongation during normal root development (Hayashi *et al.*, 2013), several lines of evidence suggest that endopolyploidization is, at least in some cases, not required for the compensatory cell enlargement. To list some examples, compensatory cell enlargement takes place in the absence of enhanced endoreplication in the strong overexpressor of Kip-related protein 2 (KRP2; (De Veylder *et al.*, 2001)), in the 2C guard cells (Autran *et al.*, 2002) or in the *an3 xs6* double mutant (Fujikura *et al.*, 2007). And finally, lack of CTD1, the DNA replication licensing factor, causes defects in cell division, increased endopolyploidy levels but smaller cells (Raynaud *et al.*, 2005), further illustrating that increases in ploidy levels are not necessarily required for compensatory cell enlargement. Taken together, while compensatory cell enlargement doesn't necessarily involve increased endopolyploidy levels, the compensatory effects that we observe in the *ak6* mutant are accompanied by it. However, it remains to be untangled to what degree does the post-mitotic cellular growth depend on the DNA content in either normal or compensatory root cell enlargement.

Autran D, Jonak C, Belcram K, Beemster GTS, Kronenberger J, Grandjean O, Inze D and Traas J. 2002. Cell numbers and leaf development in *Arabidopsis*: a functional analysis of the STRUWWELPETER gene. *The EMBO journal* **21**: 6036–6049.

De Veylder L, Beeckman T, Beemster GTS, Krols L, Terras F, Landrieu I, Van Der Schueren E, Maes S, Naudts M and Inzé D. 2001. Functional Analysis of Cyclin-Dependent Kinase Inhibitors of *Arabidopsis*. *The Plant Cell* **13**: 1653 LP – 1668.

Fujikura U, Horiguchi G and Tsukaya H. 2007. Genetic relationship between *angustifolia3* and extra-small sisters highlights novel mechanisms controlling leaf size. *Plant signaling & behavior* **2**: 378–380.

Hayashi K, Hasegawa J and Matsunaga S. 2013. The boundary of the meristematic and elongation zones in roots: endoreduplication precedes rapid cell expansion. *Scientific reports* **3**: 2723.

Raynaud C, Perennes C, Reuzeau C, Catrice O, Brown S and Bergounioux C. 2005. Cell and plastid division are coordinated through the prereplication factor AtCDT1. *Proceedings of the National Academy of Sciences* **102**: 8216–8221.

Sugimoto-Shirasu K and Roberts K. 2003. "Big it up": endoreduplication and cell-size control in plants. *Current Opinion in Plant Biology* **6**: 544–553.
